# Supplementary material
Source: PubMed Central journal article supplement (PMC6958086)
Supplement: ijcep0011-3147-f7.pdf [file ijcep0011-3147-f7.pdf]

## miR-483-5p regulates NSCLC apoptosis through RBM5

**Supplementary Table 1.** Identify potential miRNAs target on RBM5 by MicroCosm Targets Version 5

| Rfam ID         | Score   | Energy | Base P       | Poisson P    | Org P        | Start | End |
|-----------------|---------|--------|--------------|--------------|--------------|-------|-----|
| hsa-miR-708*    | 19.7566 | -27.34 | 1.206870e-03 | 1.206140e-03 | 1.206140e-03 | 443   | 465 |
| hsa-miR-30b     | 19.1088 | -17.81 | 3.551940e-03 | 3.551940e-03 | 3.551940e-03 | 261   | 282 |
| mmu-miR-743b-3p | 19.1088 | -16.89 | 6.585360e-03 | 6.585360e-03 | 8.905870e-04 | 371   | 392 |
| hsa-miR-151-3p  | 18.8798 | -19.4  | 1.671550e-03 | 1.670150e-03 | 7.352520e-04 | 442   | 462 |
| hsa-miR-220c    | 18.7849 | -25.33 | 6.739570e-03 | 6.716910e-03 | 2.321480e-03 | 390   | 411 |
| hsa-miR-30c     | 18.3729 | -17.24 | 6.535670e-03 | 4.544030e-03 | 4.544030e-03 | 260   | 282 |
| hsa-miR-499-3p  | 18.2451 | -19    | 5.360300e-03 | 5.345960e-03 | 5.345960e-03 | 367   | 388 |
| hsa-miR-938     | 18.2451 | -21.56 | 2.982260e-03 | 2.977820e-03 | 3.621500e-04 | 65    | 86  |
| hsa-miR-140-5p  | 18.2451 | -22.92 | 5.230800e-03 | 3.462110e-03 | 3.462110e-03 | 104   | 124 |
| hsa-miR-578     | 18.1202 | -24.04 | 8.773450e-03 | 8.735080e-03 | 7.653250e-03 | 19    | 39  |
| mmu-miR-466e-5p | 17.5974 | -18.3  | 1.974680e-02 | 2.829100e-03 | 1.660680e-03 | 409   | 431 |
| hsa-miR-7-1*    | 17.4894 | -15.13 | 1.846800e-02 | 1.846800e-02 | 1.846800e-02 | 360   | 381 |
| mmu-miR-705     | 17.4531 | -26.73 | 5.971710e-02 | 5.796900e-02 | 2.559340e-02 | 131   | 150 |
| hsa-miR-568     | 17.4531 | -17.41 | 3.060590e-02 | 3.014230e-02 | 7.623440e-05 | 404   | 423 |
| mmu-miR-694     | 17.4416 | -13.94 | 3.674870e-02 | 3.608170e-02 | 8.266160e-04 | 440   | 457 |
| mmu-miR-743a    | 17.3815 | -12.28 | 2.395220e-02 | 2.366760e-02 | 8.905870e-04 | 371   | 392 |
| mmu-miR-466a-5p | 17.3815 | -17.86 | 2.534490e-02 | 2.829100e-03 | 1.660680e-03 | 409   | 431 |
| mmu-miR-466c-5p | 17.2735 | -17.79 | 2.654290e-02 | 2.829100e-03 | 1.660680e-03 | 409   | 431 |
| mmu-miR-466b-5p | 17.2735 | -18.3  | 2.601580e-02 | 2.829100e-03 | 1.660680e-03 | 409   | 431 |
| hsa-let-7a*     | 17.2522 | -23.1  | 2.207760e-02 | 1.000000e-06 | 1.000000e-06 | 226   | 246 |
| hsa-miR-641     | 17.2197 | -13.47 | 2.429780e-02 | 2.400500e-02 | 2.237180e-03 | 368   | 391 |
| hsa-miR-423-5p  | 17.191  | -21.85 | 3.781790e-02 | 3.711170e-02 | 3.711170e-02 | 292   | 316 |
| hsa-miR-30e     | 17.1655 | -10.83 | 2.424060e-02 | 4.544030e-03 | 4.544030e-03 | 261   | 282 |
| hsa-miR-30a     | 17.1655 | -12.39 | 2.019310e-02 | 4.544030e-03 | 4.544030e-03 | 261   | 282 |
| hsa-miR-323-3p  | 17.1437 | -13.26 | 8.490540e-03 | 1.993120e-03 | 1.990160e-04 | 251   | 271 |
| hsa-miR-206     | 17.0576 | -18.51 | 2.777060e-02 | 2.738850e-02 | 2.738850e-02 | 303   | 323 |
| hsa-miR-10b     | 16.8687 | -21.32 | 1.207400e-02 | 1.207400e-02 | 1.207400e-02 | 117   | 138 |
| hsa-miR-141*    | 16.8417 | -13.99 | 3.023350e-02 | 2.978100e-02 | 1.561300e-02 | 431   | 452 |
| hsa-miR-19a     | 16.7612 | -13.16 | 3.106540e-02 | 3.106540e-02 | 2.556480e-04 | 400   | 422 |
| hsa-miR-28-3p   | 16.7337 | -14.97 | 1.524580e-02 | 1.513020e-02 | 1.872960e-03 | 442   | 464 |
| hsa-miR-7-2*    | 16.6257 | -12.43 | 3.089910e-02 | 3.042660e-02 | 3.042660e-02 | 360   | 381 |
| hsa-miR-194     | 16.6257 | -13.3  | 2.290410e-02 | 2.264380e-02 | 1.575790e-03 | 46    | 67  |
| hsa-miR-371-5p  | 16.5804 | -15.9  | 2.757080e-02 | 2.719420e-02 | 2.719420e-02 | 316   | 335 |
| hsa-miR-574-5p  | 16.5463 | -18.81 | 5.550450e-02 | 5.399220e-02 | 4.922530e-02 | 410   | 433 |
| hsa-let-7f-1*   | 16.5178 | -18.62 | 3.600690e-02 | 1.000000e-06 | 1.000000e-06 | 225   | 246 |
| hsa-miR-125a-5p | 16.471  | -17.34 | 3.510410e-02 | 3.449510e-02 | 3.449510e-02 | 92    | 115 |
| hsa-miR-182     | 16.471  | -13.88 | 3.639680e-02 | 3.950610e-03 | 3.950610e-03 | 450   | 470 |
| hsa-miR-221     | 16.4389 | -14.82 | 3.075830e-02 | 3.029010e-02 | 3.029010e-02 | 252   | 274 |
| hsa-miR-132     | 16.4098 | -17.94 | 2.285870e-02 | 2.259940e-02 | 7.641820e-04 | 223   | 244 |
| mmu-miR-290-5p  | 16.4098 | -17.59 | 3.224690e-02 | 3.173250e-02 | 7.835090e-03 | 314   | 335 |
| hsa-miR-30b     | 16.4098 | -15.3  | 3.615520e-02 | 4.544030e-03 | 4.544030e-03 | 226   | 247 |
| hsa-miR-15a*    | 16.4098 | -18.09 | 3.991920e-02 | 3.913290e-02 | 3.913290e-02 | 170   | 193 |
| hsa-miR-378     | 16.3842 | -16.4  | 3.651900e-02 | 3.586020e-02 | 3.565170e-02 | 443   | 463 |
| hsa-miR-30d     | 16.3019 | -11.46 | 3.615340e-02 | 4.544030e-03 | 4.544030e-03 | 261   | 282 |
| mmu-miR-467e    | 16.3019 | -13.7  | 5.730700e-02 | 5.569590e-02 | 1.330220e-02 | 412   | 434 |
| hsa-miR-489     | 16.3019 | -20.56 | 2.473160e-02 | 2.442830e-02 | 2.442830e-02 | 368   | 390 |
| hsa-miR-422a    | 16.3019 | -16.54 | 3.935780e-02 | 3.859330e-02 | 3.859330e-02 | 442   | 463 |
| mmu-miR-669b    | 16.3019 | -16.47 | 7.163400e-02 | 6.912850e-02 | 1.063610e-02 | 421   | 442 |

## miR-483-5p regulates NSCLC apoptosis through RBM5

|                 |         |        |              |              |              |     |     |
|-----------------|---------|--------|--------------|--------------|--------------|-----|-----|
| hsa-miR-523     | 16.224  | -19.33 | 7.510560e-03 | 7.482430e-03 | 7.482430e-03 | 257 | 279 |
| hsa-miR-597     | 16.1939 | -18.62 | 2.853030e-02 | 2.812720e-02 | 2.812720e-02 | 337 | 358 |
| hsa-miR-483-5p  | 16.1939 | -19.56 | 4.333250e-02 | 4.240710e-02 | 2.684530e-02 | 55  | 76  |
| hsa-miR-30c     | 16.1166 | -18.96 | 4.557700e-02 | 4.544030e-03 | 4.544030e-03 | 225 | 247 |
| hsa-let-7f-2*   | 16.0859 | -23.31 | 4.756710e-02 | 1.000000e-06 | 1.000000e-06 | 225 | 246 |
| hsa-miR-139-5p  | 16.0859 | -17.84 | 3.916460e-02 | 3.840760e-02 | 1.196310e-02 | 322 | 344 |
| hsa-miR-122     | 16.0859 | -19.92 | 5.868850e-02 | 5.699950e-02 | 7.693060e-03 | 228 | 252 |
| hsa-miR-222     | 16.0586 | -13.25 | 3.519270e-02 | 2.619020e-03 | 2.619020e-03 | 254 | 274 |
| hsa-miR-103     | 16.0091 | -13.45 | 6.562630e-02 | 6.351920e-02 | 5.060710e-03 | 320 | 342 |
| hsa-miR-10a     | 16.0091 | -20.38 | 3.347260e-02 | 3.291860e-02 | 3.291860e-02 | 117 | 138 |
| hsa-miR-125b-2* | 15.978  | -20.19 | 4.404400e-02 | 1.431440e-03 | 1.431440e-03 | 75  | 96  |
| hsa-let-7b*     | 15.978  | -16.05 | 4.098600e-02 | 1.000000e-06 | 1.000000e-06 | 225 | 246 |
| hsa-miR-448     | 15.978  | -18.22 | 6.458340e-02 | 6.254210e-02 | 8.293750e-04 | 267 | 289 |
| hsa-miR-581     | 15.9501 | -17.93 | 5.561530e-02 | 5.409700e-02 | 3.804150e-02 | 17  | 37  |
| hsa-miR-625     | 15.9501 | -16.57 | 9.789560e-02 | 4.490230e-03 | 4.490230e-03 | 148 | 167 |
| hsa-miR-625     | 15.9501 | -17.75 | 9.789560e-02 | 4.490230e-03 | 4.490230e-03 | 124 | 144 |
| hsa-miR-624     | 15.9501 | -16.93 | 7.486800e-02 | 7.213400e-02 | 2.851940e-02 | 76  | 95  |
| hsa-miR-19b     | 15.9017 | -11.53 | 5.681900e-02 | 5.523490e-02 | 2.556480e-04 | 400 | 422 |
| hsa-miR-125b-2* | 15.7621 | -24.53 | 5.448420e-02 | 1.431440e-03 | 1.431440e-03 | 196 | 216 |
| hsa-miR-363     | 15.7621 | -11.84 | 4.781370e-02 | 4.668860e-02 | 2.999670e-02 | 249 | 269 |
| hsa-let-7a*     | 15.7331 | -5     | 7.506170e-02 | 1.000000e-06 | 1.000000e-06 | 402 | 423 |
| hsa-miR-573     | 15.7223 | -11.62 | 9.268000e-02 | 8.851490e-02 | 3.088200e-02 | 105 | 127 |
| hsa-let-7f-1*   | 15.6541 | -12.02 | 7.291150e-02 | 1.000000e-06 | 1.000000e-06 | 391 | 413 |
| hsa-miR-212     | 15.6246 | -13.74 | 4.961960e-02 | 4.840870e-02 | 1.514810e-03 | 224 | 244 |
| hsa-miR-182     | 15.5084 | -15.05 | 9.163510e-02 | 3.950610e-03 | 3.950610e-03 | 378 | 401 |
| hsa-miR-187*    | 15.4382 | -20.81 | 4.466080e-02 | 4.367820e-02 | 4.367820e-02 | 282 | 303 |
| hsa-miR-140-3p  | 15.4076 | -18.86 | 8.561200e-02 | 3.462110e-03 | 3.462110e-03 | 283 | 303 |
| mmu-miR-466f-5p | 15.3302 | -21.78 | 7.717470e-02 | 2.829100e-03 | 1.660680e-03 | 266 | 288 |
| hsa-miR-222     | 15.2991 | -19.54 | 7.418050e-02 | 2.619020e-03 | 2.619020e-03 | 457 | 477 |
| hsa-miR-551b    | 15.2991 | -18.81 | 4.878480e-02 | 4.878480e-02 | 1.371850e-02 | 158 | 178 |
| hsa-miR-532-5p  | 15.2223 | -18.9  | 9.010240e-02 | 8.616240e-02 | 1.220840e-02 | 69  | 88  |
| hsa-let-7b*     | 15.1143 | -4.91  | 8.572380e-02 | 1.000000e-06 | 1.000000e-06 | 402 | 423 |
| hsa-miR-885-5p  | 15.1143 | -13.88 | 6.352070e-02 | 6.154530e-02 | 1.529340e-03 | 250 | 271 |
| hsa-miR-30d     | 15.1143 | -15.21 | 9.850000e-02 | 4.544030e-03 | 4.544030e-03 | 228 | 247 |
| hsa-miR-323-3p  | 15.0821 | -13.78 | 6.450520e-02 | 1.993120e-03 | 1.990160e-04 | 367 | 388 |
| hsa-miR-365     | 15.0064 | -9.56  | 5.455920e-02 | 5.309750e-02 | 4.090480e-02 | 68  | 89  |
| hsa-let-7d*     | 15.0064 | -20.3  | 4.145360e-02 | 1.000000e-06 | 1.000000e-06 | 331 | 352 |
| hsa-miR-100     | 15.0064 | -16.99 | 3.207400e-02 | 3.156510e-02 | 7.920160e-04 | 154 | 176 |
| mmu-miR-463     | 15.0064 | -14.67 | 8.764440e-02 | 8.391340e-02 | 1.241210e-03 | 286 | 308 |
| hsa-miR-551a    | 14.9736 | -19.46 | 7.006370e-02 | 6.766560e-02 | 1.371850e-02 | 158 | 178 |
| hsa-miR-369-5p  | 14.4666 | -11.88 | 5.133330e-02 | 1.588800e-03 | 8.026500e-04 | 28  | 49  |
| hsa-let-7d*     | 14.4666 | -18.64 | 7.021790e-02 | 1.000000e-06 | 1.000000e-06 | 224 | 246 |
| hsa-let-7i*     | 14.3586 | -17.39 | 8.965440e-02 | 1.000000e-06 | 1.000000e-06 | 391 | 413 |
| hsa-miR-369-5p  | 14.3586 | -12.86 | 5.745760e-02 | 1.588800e-03 | 8.026500e-04 | 287 | 308 |
| hsa-let-7i*     | 14.2506 | -20.04 | 9.997960e-02 | 1.000000e-06 | 1.000000e-06 | 78  | 98  |
| hsa-miR-99a     | 14.1427 | -12.61 | 8.309590e-02 | 7.973710e-02 | 8.334790e-04 | 154 | 176 |

Hsa-miR-483-5p is highlighted in the Yellow background. \* = Previous mature sequence ID.
